# Supplementary figures and images for: Trajectories of Physical Activity and Screen Media Use in Toddlers and Related Parenting Practices: Child and Mother Physical Activity Study (CAMPAS)
Source: Research Square preprint supplement (doi:10.21203/rs.3.rs-7302701/v1), 2025-08-27

Supplementary File 1.


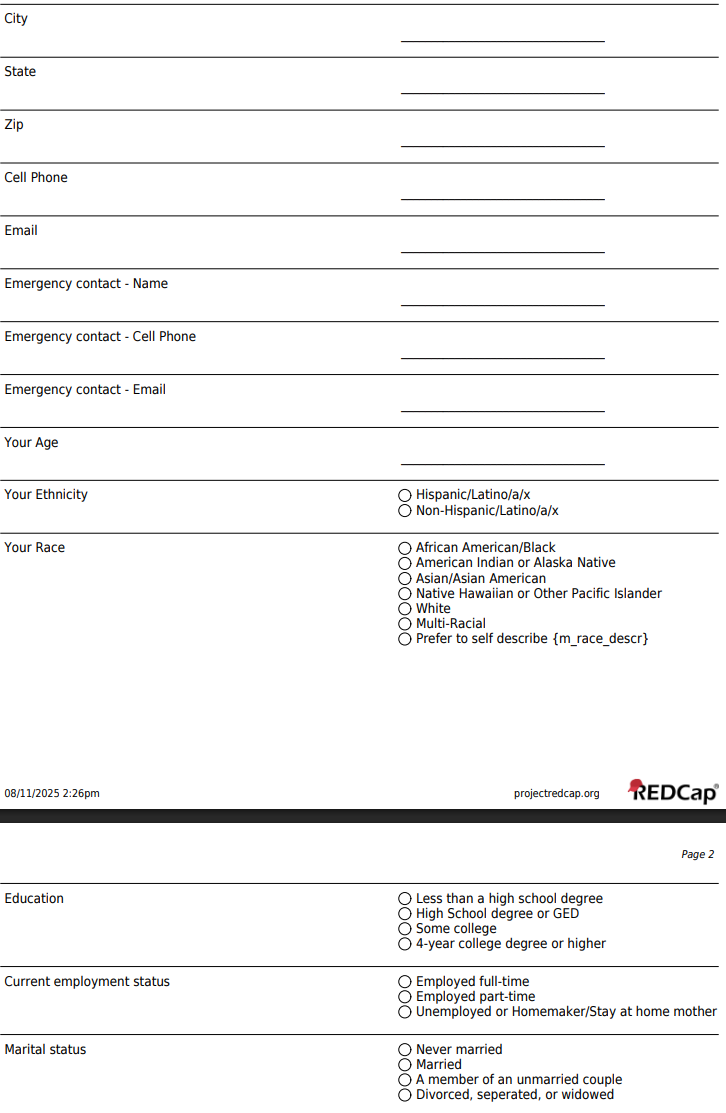


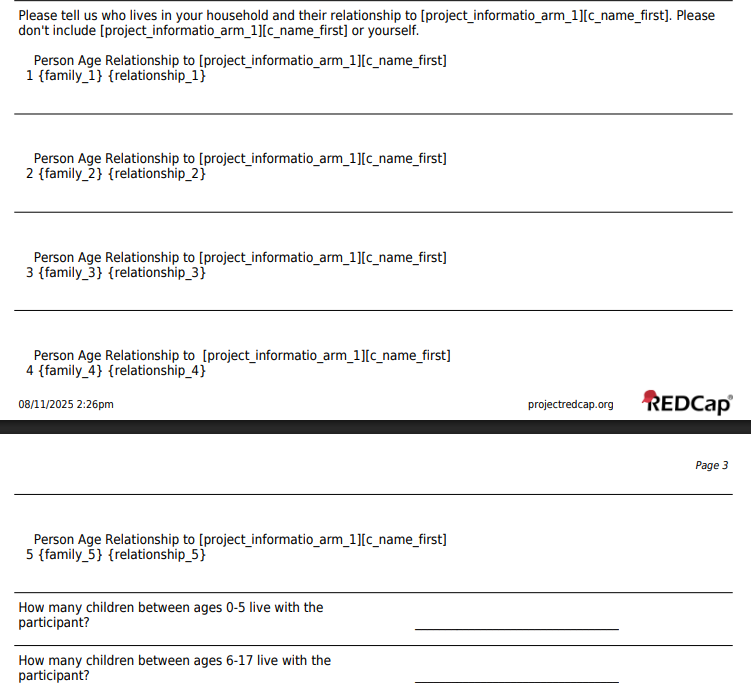

Supplement: Supplementary file 1 [file 5cb9a1541e42e455e0bb330f.docx]
